# Supplementary material for: Development of a pyrene based “turn on” fluorescent chemosensor for Hg2+
Source: Royal Society of Chemistry journal article supplement (doi:10.1039/c2ra21202a), 2012-01-01

## Electronic Supporting information:

### Development of Pyrene based “Turn On” Fluorescent Chemosensor for $\text{Hg}^{2+}$

Gandhi Sivaraman, Thangaraj Anand and Duraisamy Chellappa\*

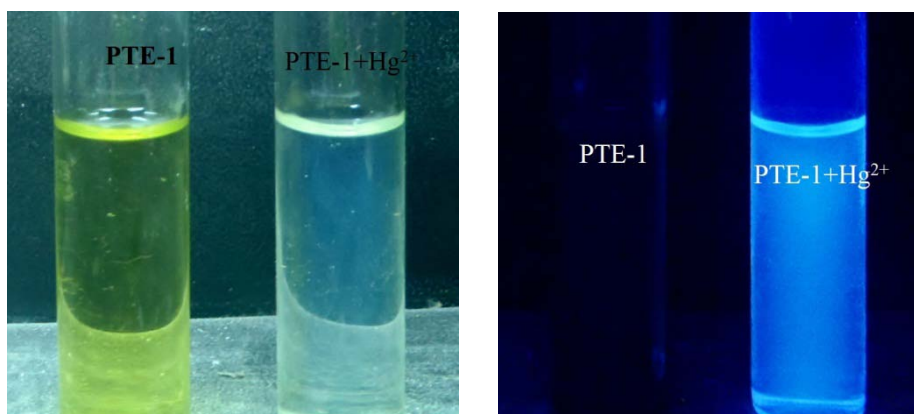

*School of Chemistry, Madurai Kamaraj University, Madurai-625021, Tamilnadu, India. E-*

*mail: [dcmkul23@gmail.com](mailto:dcmkul23@gmail.com)*

Fig-S1: <sup>1</sup>H-NMR spectrum of PTE-1

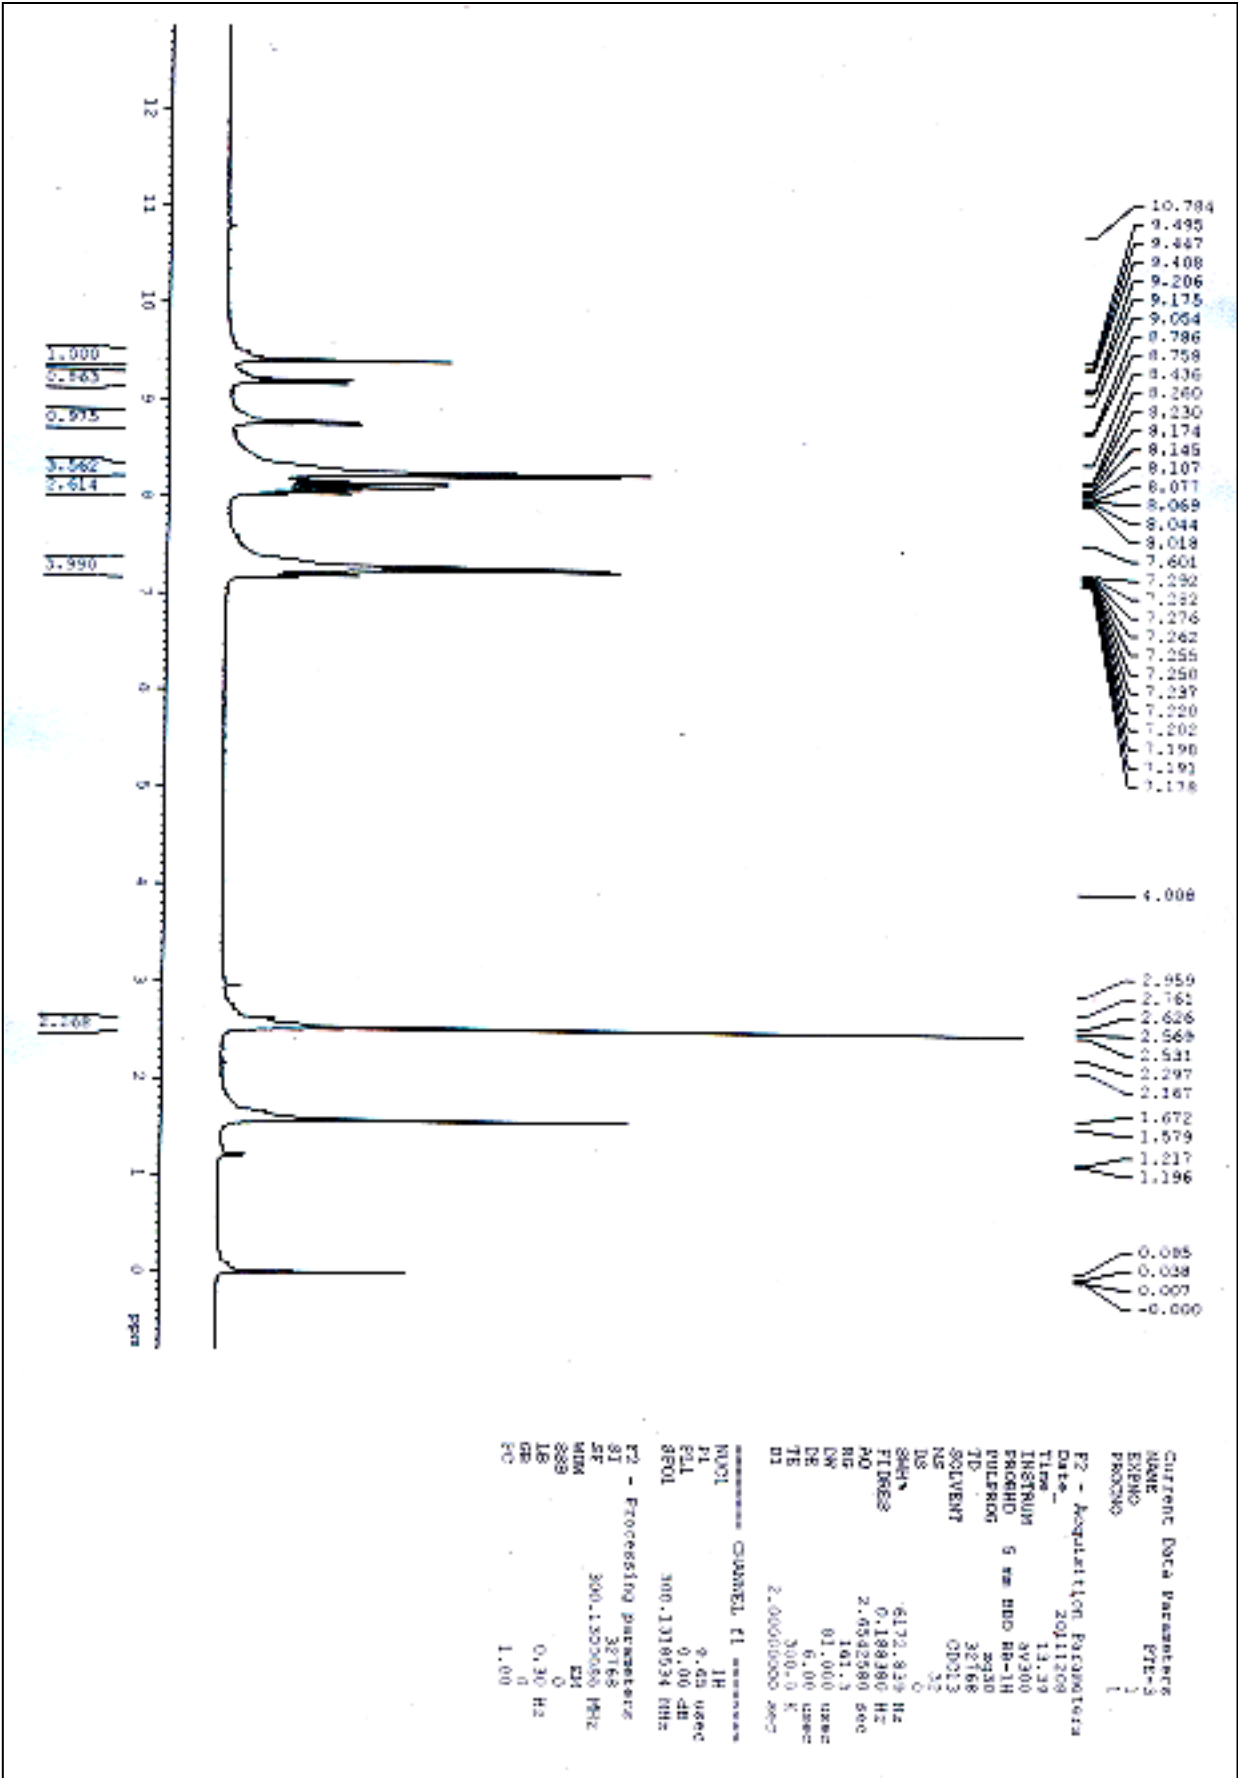

Fig-S2:  $^{13}\text{C}$ -NMR spectrum of PTE-1

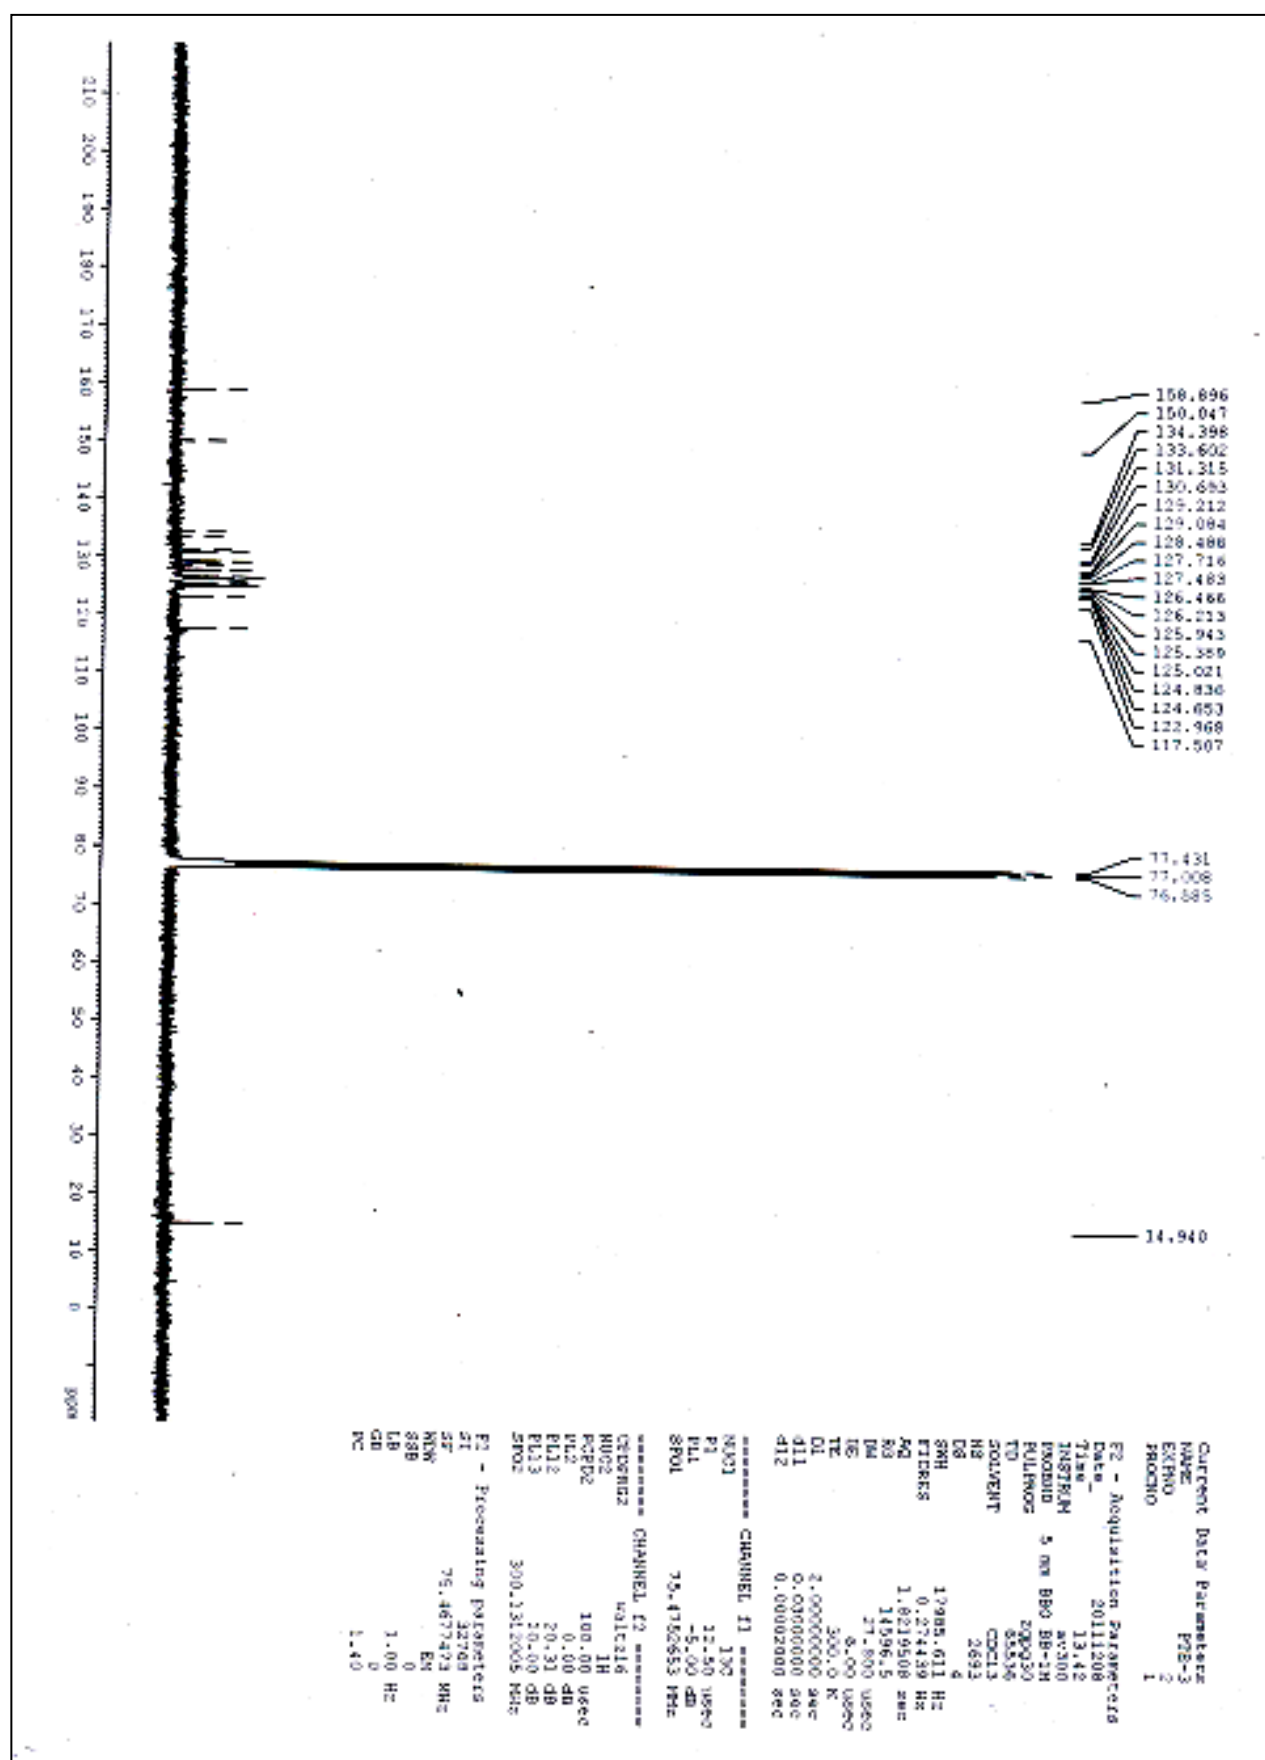

**Fig-S 3: ESI-MS spectrum of PTE-1**

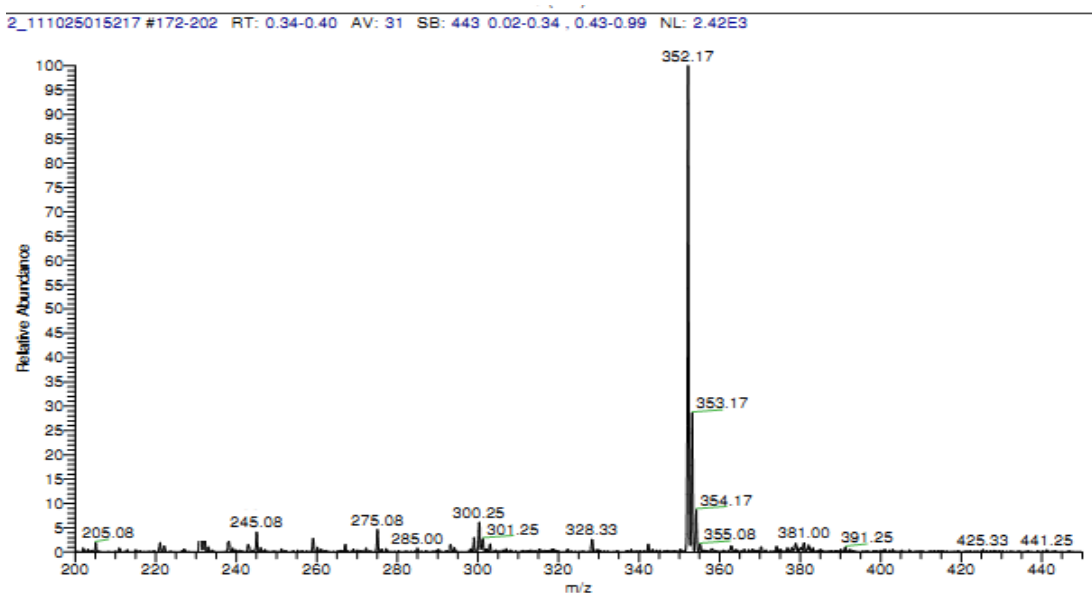

**Fig-4: The absorption spectrum with several metal cations ( $\text{Na}^+$ ,  $\text{K}^+$ ,  $\text{Ca}^{2+}$ ,  $\text{Mn}^{2+}$ ,  $\text{Fe}^{3+}$ ,  $\text{Co}^{2+}$ ,  $\text{Ni}^{2+}$ ,  $\text{Cu}^{2+}$ ,  $\text{Zn}^{2+}$ ,  $\text{Cd}^{2+}$ ,  $\text{Hg}^{2+}$ ,  $\text{Pb}^{2+}$ , and  $\text{Sn}^{2+}$ ) using their chloride salts in  $\text{H}_2\text{O}-\text{CH}_3\text{CN}$  (30:70,v/v). Inset selected wavelength to show the changes.**

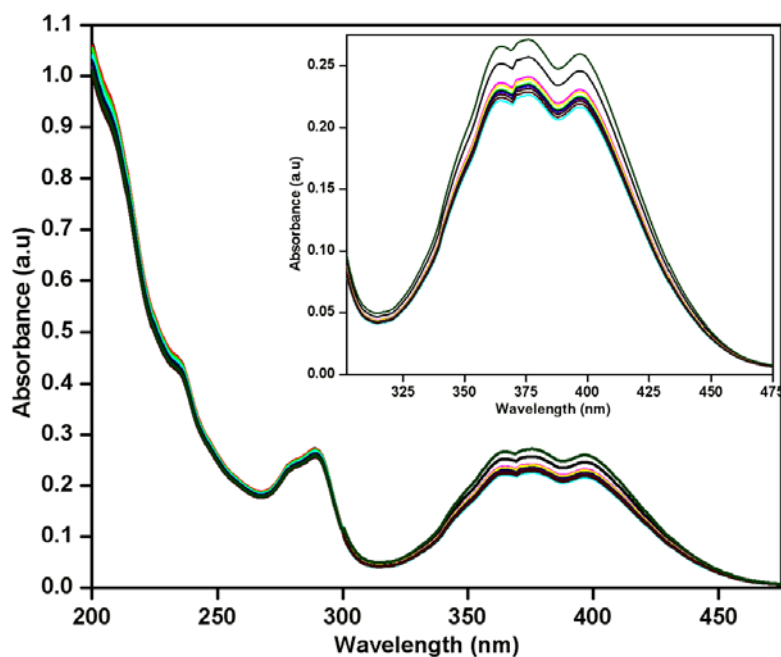

**Fig-S5: Fluorescence response of 1  $\mu$ M PTE-1 to various metal ions.** Bars represent the final ( $F_f$ ) over the initial ( $F_i$ ) integrated emission. The red bars represent the addition of the corresponding metal ion to PTE-1. The blue bars represent the change of the emission that occurs upon the subsequent addition of  $Hg^{2+}$  to the above solution. Excitation at 340 nm, emission integrated over 380-560 nm (slit width = 5 nm).

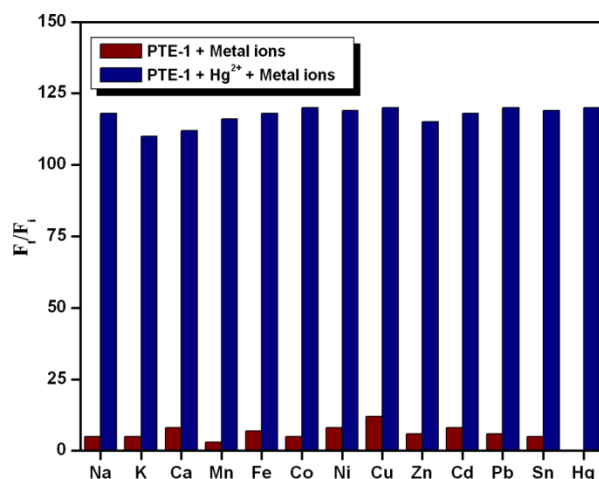

**Fig-S6: Fluorescence response of PTE-1 +  $Hg^{2+}$  on addition with sodium Sulfide**

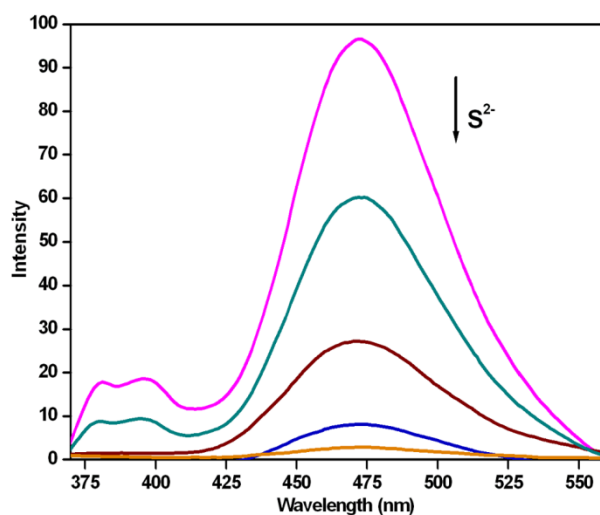

**Fig-S7: Dependence of the intensity ratio of emission at 472 nm ( $I_f/I_i$ ) on  $Hg^{2+}$**

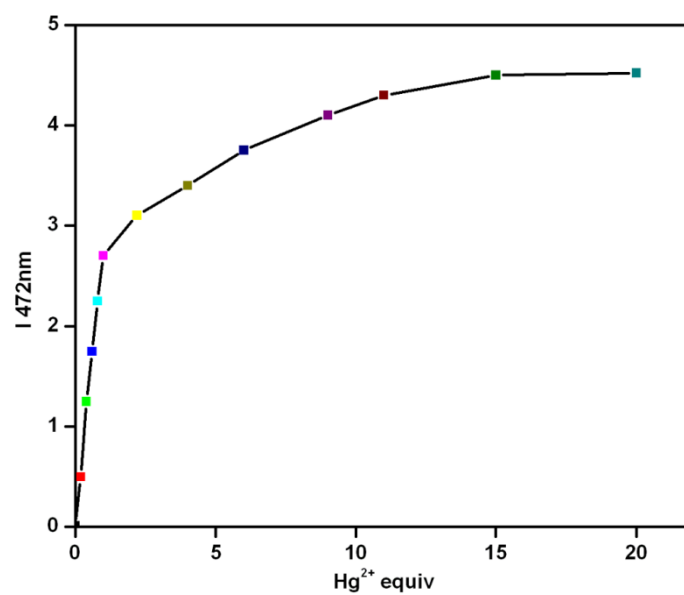

**Fig-S8: Fluorescence intensity vs mole fraction of  $Hg^{2+}$  Job's plot**

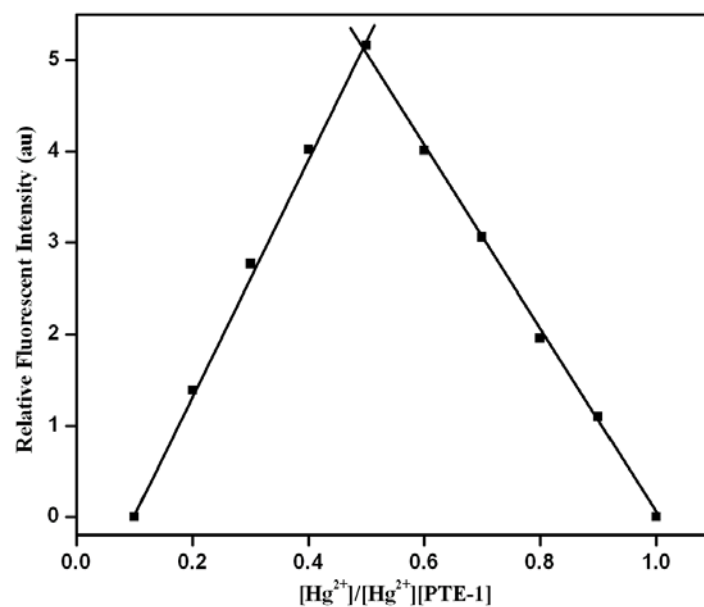

**Fig-S9: ESI-MS spectrum of PTE-1+Hg<sup>2+</sup>**

PTHG\_120319231258 #325 RT: 0.83 AV: 1 NL: 1.73E4

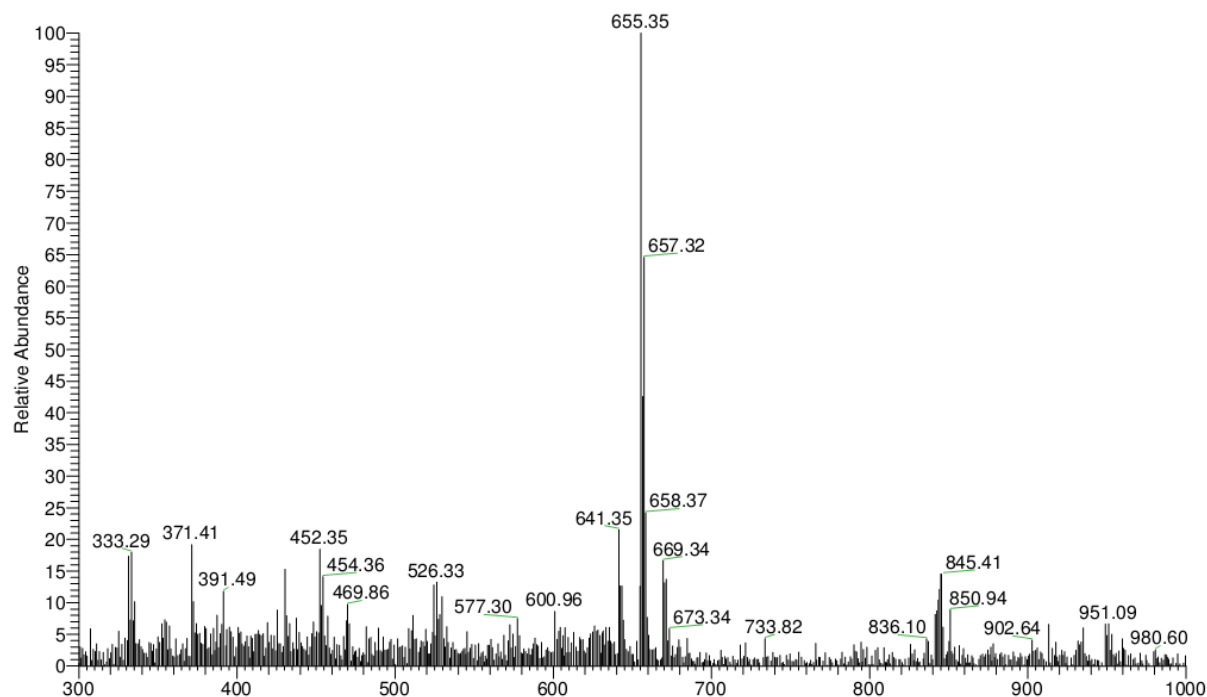

**Fig-S10: Emission spectra of metal ions with PTE-2 and Emission spectra comparison of PTE-1 with PTE-1+Hg<sup>2+</sup> and PTE-2.**

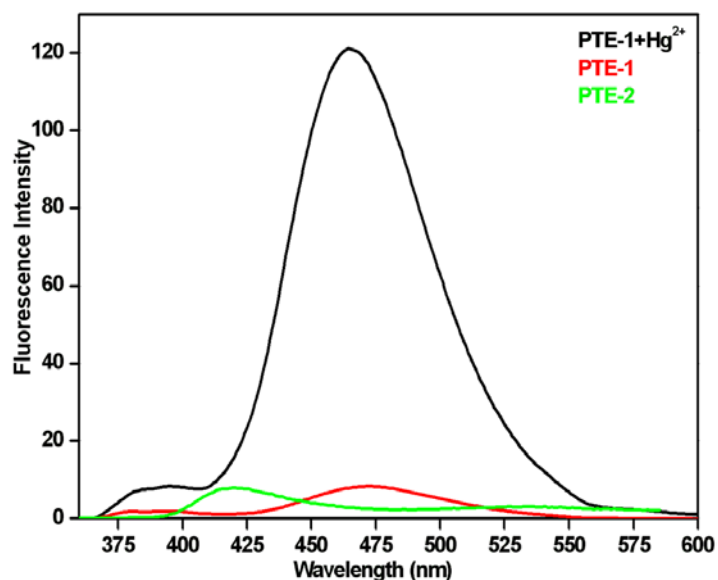

**Fig-S11: Optimized geometry of the PTE-1 by DFT-B3LYP/6-31G (d, p) basis set**

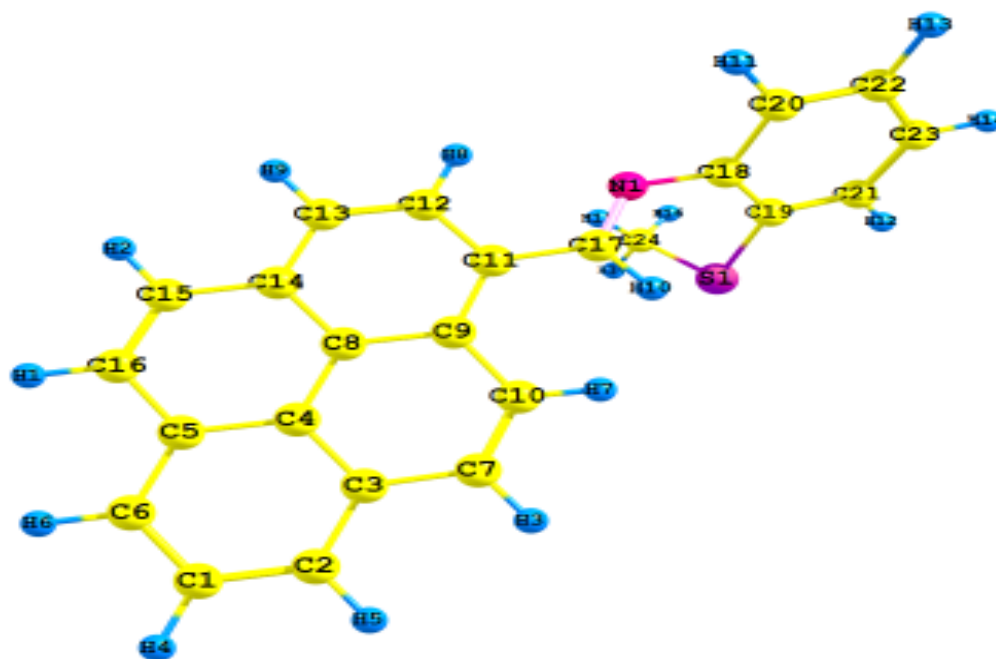

**Fig-S12: Optimized geometry of the PTE-1+ Hg<sup>2+</sup> by DFT-B3LYP /LANL2DZ basis set**

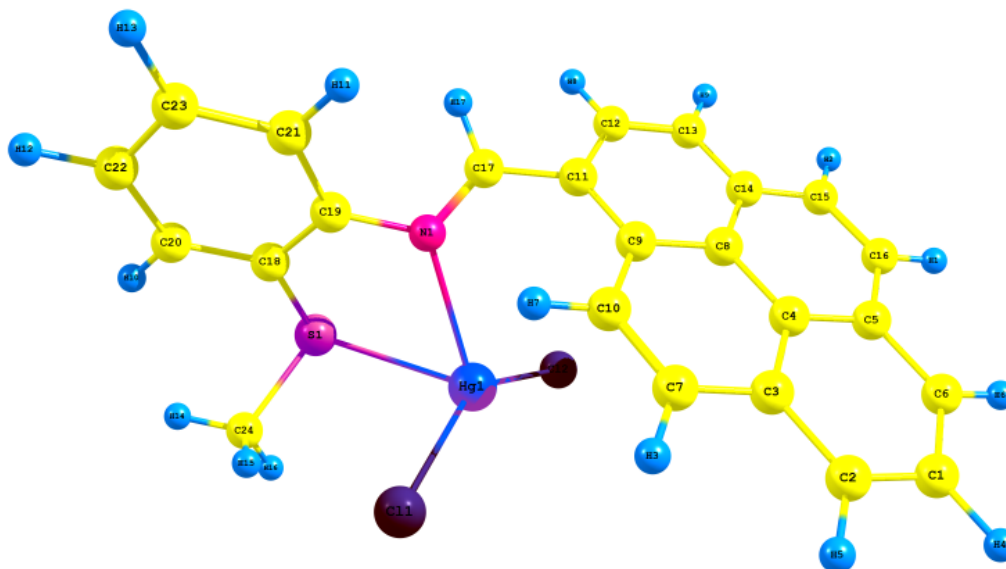



**Table-S1: Frontier molecular orbital plots of PTE-1 and PTE-1 +Hg<sup>2+</sup>**

|         | PTE-1                                                                               | PTE-1+Hg <sup>2+</sup>                                                                |
|---------|-------------------------------------------------------------------------------------|---------------------------------------------------------------------------------------|
| HOMO    | 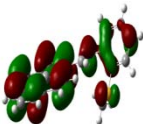   |    |
| LUMO    |  |  |
| HOMO -1 |  |  |

**Table-S2: Calculated dominant electronic transition wavelength with oscillator strength of PTE-1 and PTE-1+Hg<sup>2+</sup>**

| Transition    | PTE-1<br>Wavelength (nm)<br>(oscillator strength ) | PTE-1+Hg <sup>2+</sup><br>Wavelength (nm)<br>(oscillator strength) |
|---------------|----------------------------------------------------|--------------------------------------------------------------------|
| HOMO - LUMO   | 427.72 (0.2138)                                    | 397.14 (0.5446)                                                    |
| HOMO-1 - LUMO | 388.26(0.4329)                                     | 357.04(0.0163)                                                     |
| HOMO-3 - LUMO | 290.18(0.2065)                                     | 244.44(0.0249)                                                     |

**Fig-S13: The cell viability studies were done from lower to higher concentration.**

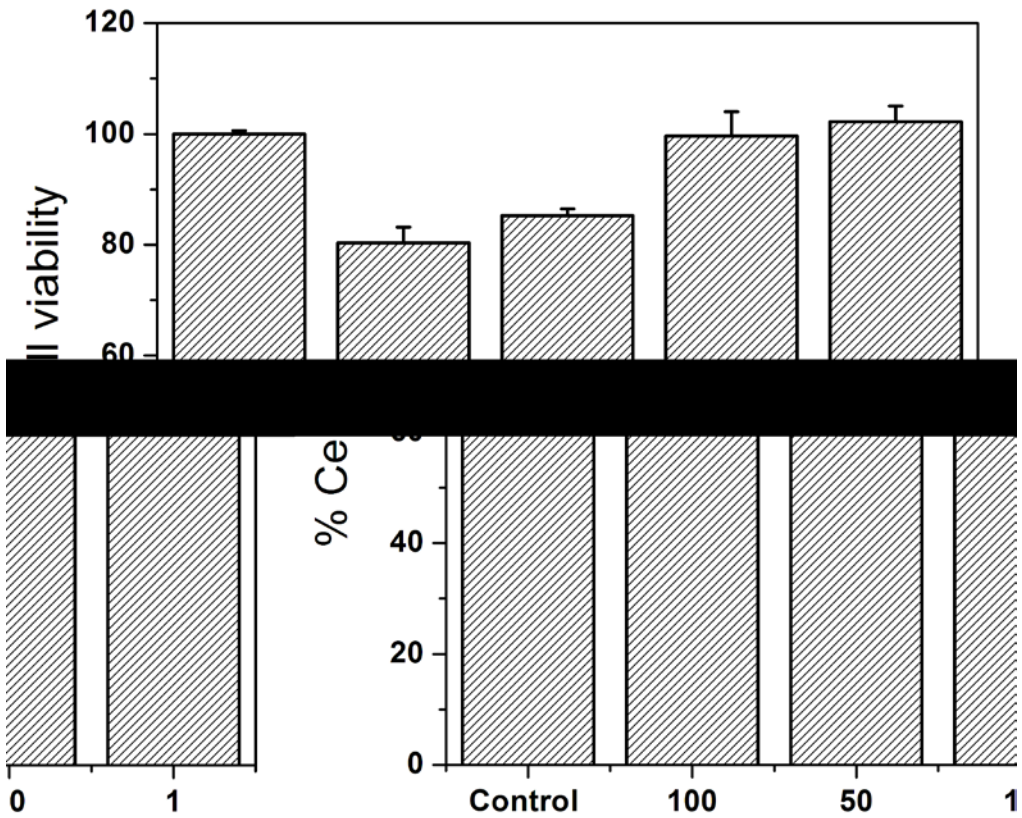

Fig-S14 : <sup>1</sup>H NMR Spectra of PTE-2.

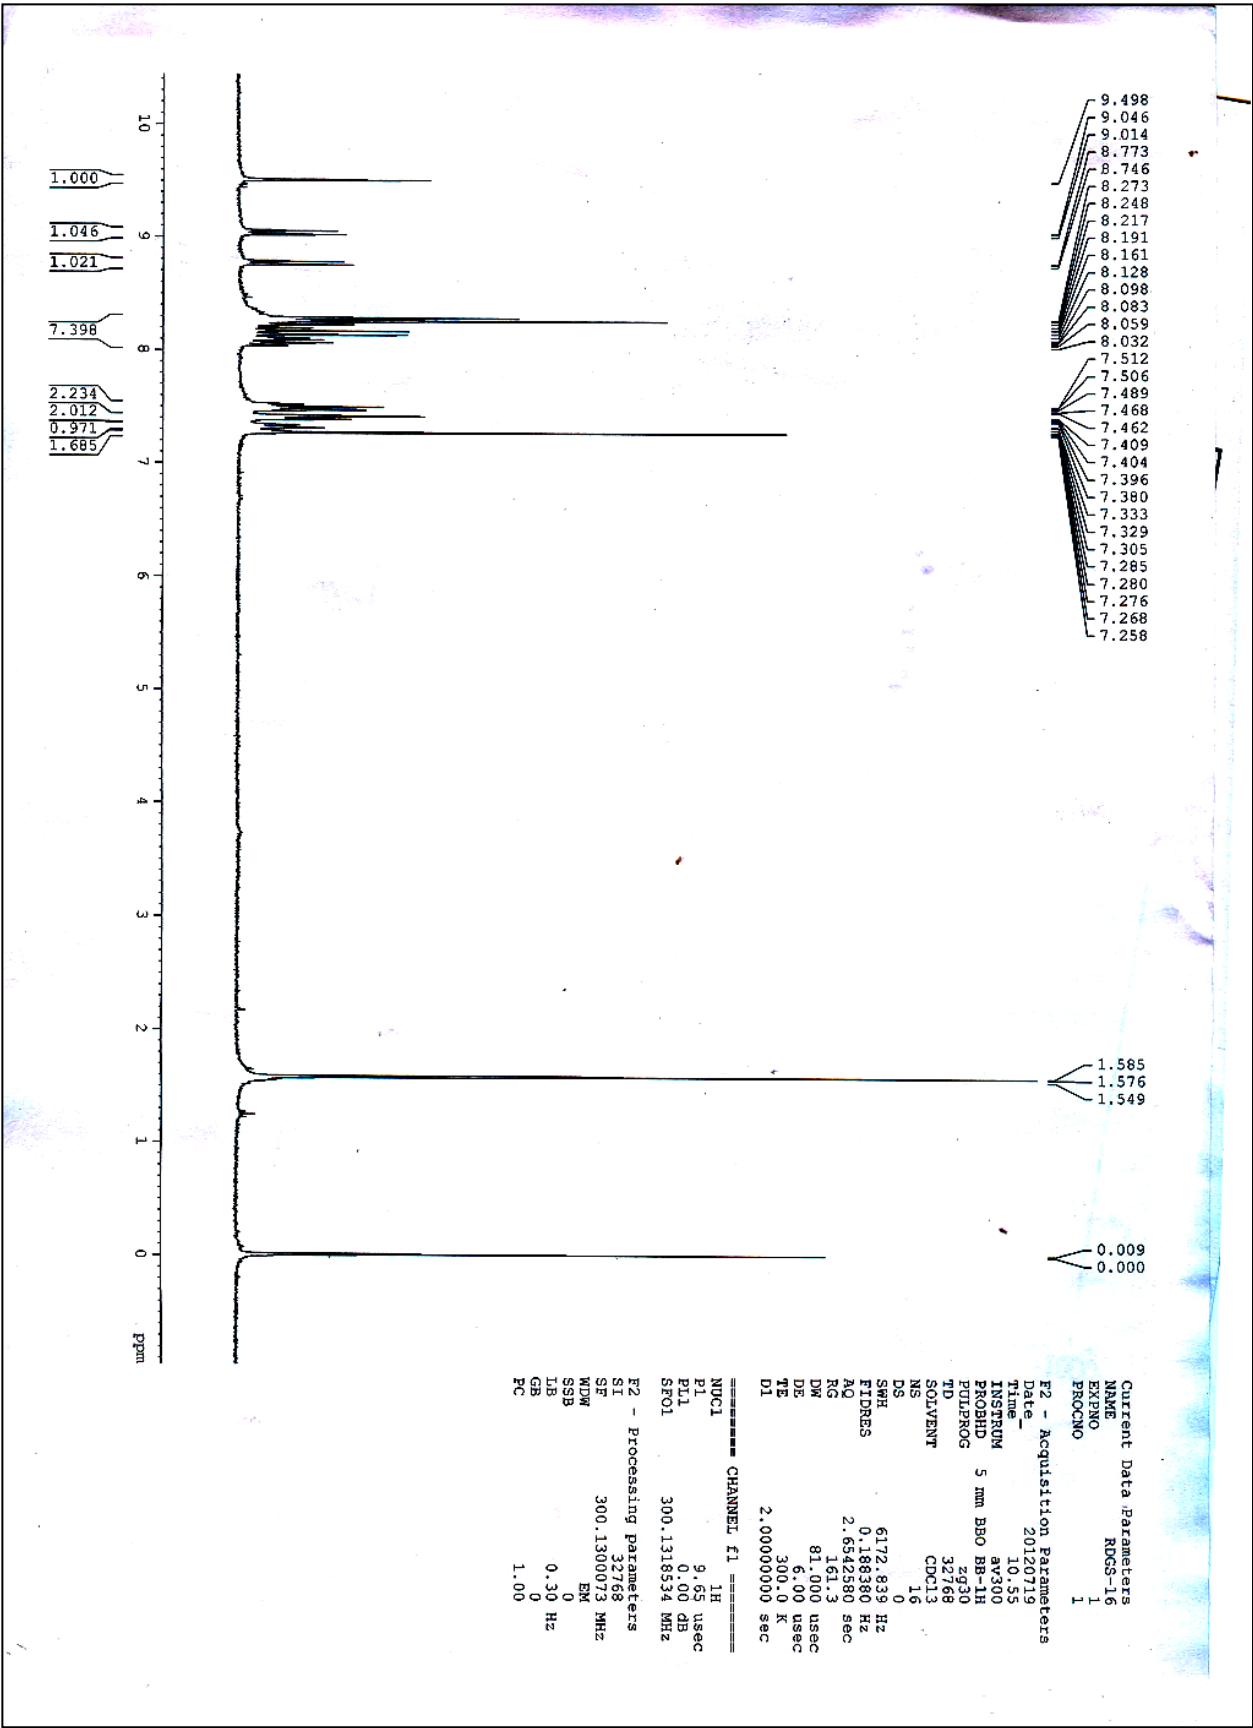

Supplement: c2ra21202a.pdf [file c2ra21202a.pdf]
